# Supplementary material for: Motion of VAPB molecules reveals ER–mitochondria contact site subdomains
Source: PubMed Central journal article supplement (PMC10830423; doi:10.1038/s41586-023-06956-y), 2024-01-24
Supplement: 41586_2023_6956_MOESM2_ESM.pdf [file 41586_2023_6956_MOESM2_ESM.pdf]

## Reporting Summary

Nature Portfolio wishes to improve the reproducibility of the work that we publish. This form provides structure for consistency and transparency in reporting. For further information on Nature Portfolio policies, see our [Editorial Policies](#) and the [Editorial Policy Checklist](#).

### Statistics

For all statistical analyses, confirm that the following items are present in the figure legend, table legend, main text, or Methods section.

- | n/a                                 | Confirmed                                                                                                                                                                                                                                                                                      |
|-------------------------------------|------------------------------------------------------------------------------------------------------------------------------------------------------------------------------------------------------------------------------------------------------------------------------------------------|
| <input type="checkbox"/>            | <input checked="" type="checkbox"/> The exact sample size ( $n$ ) for each experimental group/condition, given as a discrete number and unit of measurement                                                                                                                                    |
| <input type="checkbox"/>            | <input checked="" type="checkbox"/> A statement on whether measurements were taken from distinct samples or whether the same sample was measured repeatedly                                                                                                                                    |
| <input type="checkbox"/>            | <input checked="" type="checkbox"/> The statistical test(s) used AND whether they are one- or two-sided<br><i>Only common tests should be described solely by name; describe more complex techniques in the Methods section.</i>                                                               |
| <input type="checkbox"/>            | <input checked="" type="checkbox"/> A description of all covariates tested                                                                                                                                                                                                                     |
| <input type="checkbox"/>            | <input checked="" type="checkbox"/> A description of any assumptions or corrections, such as tests of normality and adjustment for multiple comparisons                                                                                                                                        |
| <input type="checkbox"/>            | <input checked="" type="checkbox"/> A full description of the statistical parameters including central tendency (e.g. means) or other basic estimates (e.g. regression coefficient) AND variation (e.g. standard deviation) or associated estimates of uncertainty (e.g. confidence intervals) |
| <input type="checkbox"/>            | <input checked="" type="checkbox"/> For null hypothesis testing, the test statistic (e.g. $F$ , $t$ , $r$ ) with confidence intervals, effect sizes, degrees of freedom and $P$ value noted<br><i>Give <math>P</math> values as exact values whenever suitable.</i>                            |
| <input type="checkbox"/>            | <input checked="" type="checkbox"/> For Bayesian analysis, information on the choice of priors and Markov chain Monte Carlo settings                                                                                                                                                           |
| <input type="checkbox"/>            | <input checked="" type="checkbox"/> For hierarchical and complex designs, identification of the appropriate level for tests and full reporting of outcomes                                                                                                                                     |
| <input checked="" type="checkbox"/> | <input type="checkbox"/> Estimates of effect sizes (e.g. Cohen's $d$ , Pearson's $r$ ), indicating how they were calculated                                                                                                                                                                    |

*Our web collection on [statistics for biologists](#) contains articles on many of the points above.*

### Software and code

Policy information about [availability of computer code](#)

**Data collection** Nikon Elements AR 6.0, ZEN Black 2.3  
The microscopes are operated using standard commercial software from Nikon (Nikon Elements) or Zeiss (ZEN Black), but can in principle be collected using any custom or public operation software for optical hardware.

**Data analysis** Fiji-ImageJ (v.1.54f) with TrackMate plugin (v7.11.1)  
Matlab 2022a (2015b for Ursa Analytics Code)  
Python (v. 2.7.13)  
All code used throughout manuscript is freely available at Github through the following repository (and associated linked repositories):  
<https://github.com/cjobara/Obara-Nixon-Abell-2023-Nature>

For manuscripts utilizing custom algorithms or software that are central to the research but not yet described in published literature, software must be made available to editors and reviewers. We strongly encourage code deposition in a community repository (e.g. GitHub). See the Nature Portfolio [guidelines for submitting code & software](#) for further information.

## Data

Policy information about [availability of data](#)

All manuscripts must include a [data availability statement](#). This statement should provide the following information, where applicable:

- Accession codes, unique identifiers, or web links for publicly available datasets
- A description of any restrictions on data availability
- For clinical datasets or third party data, please ensure that the statement adheres to our [policy](#)

The experimental data used in this paper are freely available in both raw and processed form at Figshare with the identifier: <https://doi.org/10.25378/janelia.c.6916543.v1>. All data are additionally available from the authors in other formats as needed upon request.

## Research involving human participants, their data, or biological material

Policy information about studies with [human participants or human data](#). See also policy information about [sex, gender \(identity/presentation\), and sexual orientation](#) and [race, ethnicity and racism](#).

|                                                                    |                                                                   |
|--------------------------------------------------------------------|-------------------------------------------------------------------|
| Reporting on sex and gender                                        | <a href="#">N/A - There is no data of this type in the paper.</a> |
| Reporting on race, ethnicity, or other socially relevant groupings | <a href="#">N/A - There is no data of this type in the paper.</a> |
| Population characteristics                                         | <a href="#">N/A - There is no data of this type in the paper.</a> |
| Recruitment                                                        | <a href="#">N/A - There is no data of this type in the paper.</a> |
| Ethics oversight                                                   | <a href="#">N/A - There is no data of this type in the paper.</a> |

Note that full information on the approval of the study protocol must also be provided in the manuscript.

## Field-specific reporting

Please select the one below that is the best fit for your research. If you are not sure, read the appropriate sections before making your selection.

Life sciences  Behavioural & social sciences  Ecological, evolutionary & environmental sciences

For a reference copy of the document with all sections, see [nature.com/documents/nr-reporting-summary-flat.pdf](https://www.nature.com/documents/nr-reporting-summary-flat.pdf)

## Life sciences study design

All studies must disclose on these points even when the disclosure is negative.

|                 |                                                                                                                                                                                                                                                                                                                                                                                                                                                                                                                                                                                                                                                                                                                                                                                                                                                                                                                                                                                                                                                                                                                                                                                                                                                                                            |
|-----------------|--------------------------------------------------------------------------------------------------------------------------------------------------------------------------------------------------------------------------------------------------------------------------------------------------------------------------------------------------------------------------------------------------------------------------------------------------------------------------------------------------------------------------------------------------------------------------------------------------------------------------------------------------------------------------------------------------------------------------------------------------------------------------------------------------------------------------------------------------------------------------------------------------------------------------------------------------------------------------------------------------------------------------------------------------------------------------------------------------------------------------------------------------------------------------------------------------------------------------------------------------------------------------------------------|
| Sample size     | Each SPT dataset contains a total of at least 16 regions (20.48 um x 20.48 um) each selected from a different cell divided over at least two experiments. Not all of these contained contact sites (see Extended Data Fig. 2). FIB-SEM data was visually examined in 3 COS7 cells and 1 U2-OS cell, but all data shown or quantified in the paper comes from a single representative COS7 cell. Single contact site analysis was performed on each of the hundreds of contact sites analyzed, each of which contains anywhere from 1-50 VAPB trajectories. No statistics were performed to determine appropriate sample size, and sample size per condition was largely governed by the technical limitations of the experiment and how many cells could be collected within the time window when the sample was healthy (see Supplemental Text, Sections IVA and VA for detailed explanation). All of the samples imaged showed variability across the entire range of possible values in the specific locations and functions of tethers, even over short time scales (see Ext. Data Fig. 2), and this was consistent in every independent experiment run. Thus, we feel the samples presented are sufficient to demonstrate the variation of the system, which is our major conclusion. |
| Data exclusions | No data was excluded from this study, though density-based identification of contact sites is performed manually based on the VAPB expression level in the cell. Thus, contact sites that do not have sufficient VAPB molecule interactions during the movie are likely removed from the dataset by lack of recognition.                                                                                                                                                                                                                                                                                                                                                                                                                                                                                                                                                                                                                                                                                                                                                                                                                                                                                                                                                                   |
| Replication     | All experiments in the paper were performed at least two independent times. No significant differences were observed between independent experiments--all samples examined showed consistent dynamic exchange and cell-to-cell variability across the range of potential tethering behaviors (see Extended Data Fig. 2 for quantification). The FIB-SEM volume presented contains two COS7 cells, and we visually checked the contact sites were similar in shape and abundance in both cells an additional two datasets that belong to other experimenters (one COS7 cell and one U2-OS cell). On account of the labor required, we only performed full reconstructions in the two subvolumes used in the paper, which come from the same cell (and a single control volume that is provided in the data repository but not the paper, since it did not have specific contact sites). All this data is provided in the Figshare repository.                                                                                                                                                                                                                                                                                                                                               |
| Randomization   | We did not randomize any aspects of the study, save the order in which datasets had manual thresholding applied. This was done in a random order to avoid bias about how thresholds were applied.                                                                                                                                                                                                                                                                                                                                                                                                                                                                                                                                                                                                                                                                                                                                                                                                                                                                                                                                                                                                                                                                                          |
| Blinding        | SPT experiments are always performed essentially blind, since the experimenter cannot see the data while setting up the scope and initiating                                                                                                                                                                                                                                                                                                                                                                                                                                                                                                                                                                                                                                                                                                                                                                                                                                                                                                                                                                                                                                                                                                                                               |

the imaging acquisition. Regions that are flat enough to perform SPT are selected using the structure of the ER (which is visible to the experimentalist). All downstream analysis is performed with the analyst blinded and the data in a scrambled order, thus, all priors and parameters are established blind. However, the majority of this pipeline is automated regardless, as such, there is little space for the analyst to affect the results even if they knew which dataset they worked with.

## Reporting for specific materials, systems and methods

We require information from authors about some types of materials, experimental systems and methods used in many studies. Here, indicate whether each material, system or method listed is relevant to your study. If you are not sure if a list item applies to your research, read the appropriate section before selecting a response.

### Materials & experimental systems

| n/a                                 | Involvement in the study                                  |
|-------------------------------------|-----------------------------------------------------------|
| <input checked="" type="checkbox"/> | <input type="checkbox"/> Antibodies                       |
| <input type="checkbox"/>            | <input checked="" type="checkbox"/> Eukaryotic cell lines |
| <input checked="" type="checkbox"/> | <input type="checkbox"/> Palaeontology and archaeology    |
| <input checked="" type="checkbox"/> | <input type="checkbox"/> Animals and other organisms      |
| <input checked="" type="checkbox"/> | <input type="checkbox"/> Clinical data                    |
| <input checked="" type="checkbox"/> | <input type="checkbox"/> Dual use research of concern     |
| <input checked="" type="checkbox"/> | <input type="checkbox"/> Plants                           |

### Methods

| n/a                                 | Involvement in the study                        |
|-------------------------------------|-------------------------------------------------|
| <input checked="" type="checkbox"/> | <input type="checkbox"/> ChIP-seq               |
| <input checked="" type="checkbox"/> | <input type="checkbox"/> Flow cytometry         |
| <input checked="" type="checkbox"/> | <input type="checkbox"/> MRI-based neuroimaging |

## Eukaryotic cell lines

Policy information about [cell lines and Sex and Gender in Research](#)

|                                                                      |                                                                                                                                                                                                                                             |
|----------------------------------------------------------------------|---------------------------------------------------------------------------------------------------------------------------------------------------------------------------------------------------------------------------------------------|
| Cell line source(s)                                                  | All experiments in the paper are performed using COS7 cells from ATCC, experiments are performed within 40 passages of the initial shock provided.                                                                                          |
| Authentication                                                       | We have not performed any authentication of the lines beyond purchasing a second aliquot from ATCC and performing an independent repeat of some of the SPT experiments in them. There were no obvious differences in any property examined. |
| Mycoplasma contamination                                             | Cells were all free of mycoplasma at the time of experimentation, and are tested routinely during passaging.                                                                                                                                |
| Commonly misidentified lines<br>(See <a href="#">ICLAC</a> register) | No commonly misidentified cell lines were used in this study.                                                                                                                                                                               |
